# Supplementary material
Source: MDPI journal article supplement (https://www.mdpi.com/2079-9284/10/3/72)
Supplement: s1 [file s1]

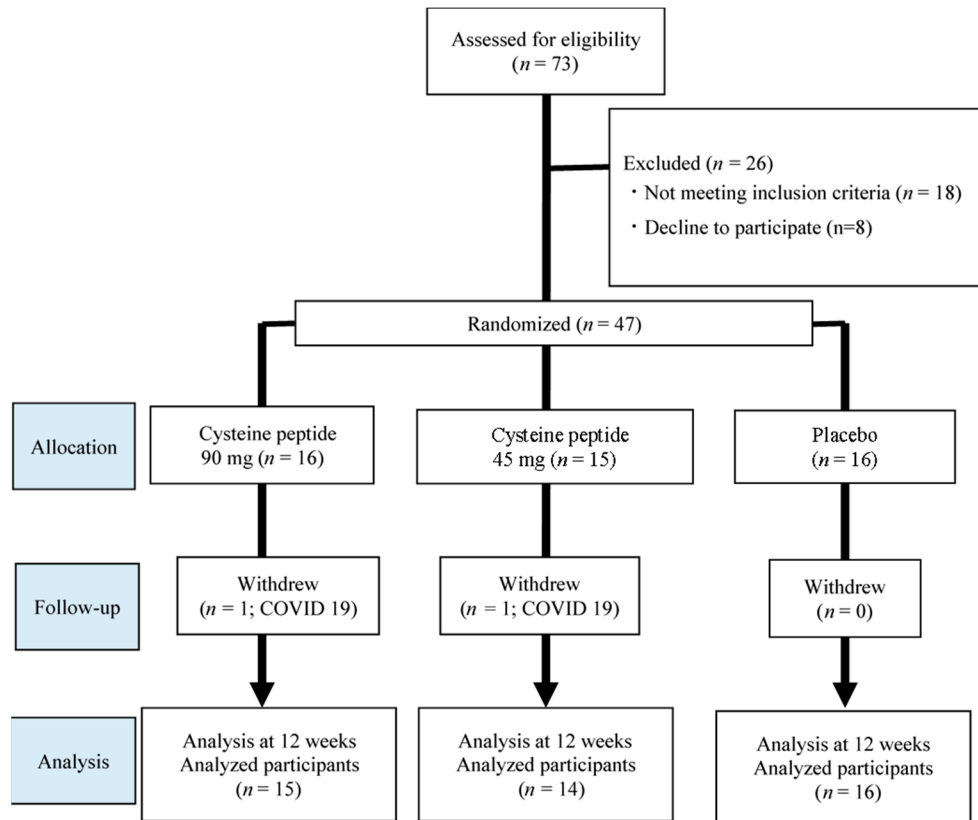

**Figure S1.** Flow diagram of the present study.

|                         | Measure<br>ment             | SCR                  |                      | During intervention                           |                                          |                                          |                                           |                                           |
|-------------------------|-----------------------------|----------------------|----------------------|-----------------------------------------------|------------------------------------------|------------------------------------------|-------------------------------------------|-------------------------------------------|
|                         |                             | (Visit 1)<br><br>1st | (Visit 2)<br><br>2nd | (Visit 3)<br><br>Before<br>start of<br>intake | (Visit 4)<br><br>4 weeks<br>after intake | (Visit 5)<br><br>8 weeks<br>after intake | (Visit 6)<br><br>12 weeks<br>after intake | (Visit 7)<br><br>16 weeks<br>after intake |
| Physical<br>measurement | Height                      | ○                    |                      |                                               |                                          |                                          |                                           |                                           |
|                         | Weight                      | ○                    | ○                    | ○                                             | ○                                        | ○                                        | ○                                         | ○                                         |
|                         | BMI                         | ○                    | ○                    | ○                                             | ○                                        | ○                                        | ○                                         | ○                                         |
|                         | Vital<br>signs              | ○                    | ○                    | ○                                             | ○                                        | ○                                        | ○                                         | ○                                         |
| Urinalysis              | pH                          | ○                    | ○                    | ○                                             | ○                                        | ○                                        | ○                                         | ○                                         |
|                         | Specific<br>gravity         | ○                    | ○                    | ○                                             | ○                                        | ○                                        | ○                                         | ○                                         |
|                         | Protein                     | ○                    | ○                    | ○                                             | ○                                        | ○                                        | ○                                         | ○                                         |
|                         | Glucose                     | ○                    | ○                    | ○                                             | ○                                        | ○                                        | ○                                         | ○                                         |
|                         | Urobilino<br>gen            | ○                    | ○                    | ○                                             | ○                                        | ○                                        | ○                                         | ○                                         |
|                         | Occult<br>blood<br>reaction | ○                    | ○                    | ○                                             | ○                                        | ○                                        | ○                                         | ○                                         |
|                         | Bilirubin                   | ○                    | ○                    | ○                                             | ○                                        | ○                                        | ○                                         | ○                                         |
|                         | Ketone<br>bodies            | ○                    | ○                    | ○                                             | ○                                        | ○                                        | ○                                         | ○                                         |
| Hematology              | WBC                         | ○                    | ○                    | ○                                             | ○                                        | ○                                        | ○                                         | ○                                         |
|                         | RBC                         | ○                    | ○                    | ○                                             | ○                                        | ○                                        | ○                                         | ○                                         |
|                         | Hb                          | ○                    | ○                    | ○                                             | ○                                        | ○                                        | ○                                         | ○                                         |
|                         | Ht                          | ○                    | ○                    | ○                                             | ○                                        | ○                                        | ○                                         | ○                                         |
|                         | MCV                         | ○                    | ○                    | ○                                             | ○                                        | ○                                        | ○                                         | ○                                         |
|                         | MCH                         | ○                    | ○                    | ○                                             | ○                                        | ○                                        | ○                                         | ○                                         |
|                         | MCHC                        | ○                    | ○                    | ○                                             | ○                                        | ○                                        | ○                                         | ○                                         |
|                         | Plt                         | ○                    | ○                    | ○                                             | ○                                        | ○                                        | ○                                         | ○                                         |

|                               | Measur<br>ement | SCR              |                  | During intervention                    |                                      |                                      |                                       |                                       |
|-------------------------------|-----------------|------------------|------------------|----------------------------------------|--------------------------------------|--------------------------------------|---------------------------------------|---------------------------------------|
|                               |                 | (Visit 1)<br>1st | (Visit 2)<br>2nd | (Visit 3)<br>Before start<br>of intake | (Visit 4)<br>4 weeks<br>after intake | (Visit 5)<br>8 weeks<br>after intake | (Visit 6)<br>12 weeks<br>after intake | (Visit 7)<br>16 weeks<br>after intake |
| Blood<br>biochemistry<br>test | TG              | ○                | ○                | ○                                      | ○                                    | ○                                    | ○                                     | ○                                     |
|                               | T-Cho           | ○                | ○                | ○                                      | ○                                    | ○                                    | ○                                     | ○                                     |
|                               | BUN             | ○                | ○                | ○                                      | ○                                    | ○                                    | ○                                     | ○                                     |
|                               | T-Bil           | ○                | ○                | ○                                      | ○                                    | ○                                    | ○                                     | ○                                     |
|                               | TP              | ○                | ○                | ○                                      | ○                                    | ○                                    | ○                                     | ○                                     |
|                               | ALB             | ○                | ○                | ○                                      | ○                                    | ○                                    | ○                                     | ○                                     |
|                               | ALP             | ○                | ○                | ○                                      | ○                                    | ○                                    | ○                                     | ○                                     |
|                               | LDH             | ○                | ○                | ○                                      | ○                                    | ○                                    | ○                                     | ○                                     |
|                               | γ-GTP           | ○                | ○                | ○                                      | ○                                    | ○                                    | ○                                     | ○                                     |
|                               | AST             | ○                | ○                | ○                                      | ○                                    | ○                                    | ○                                     | ○                                     |
|                               | ALT             | ○                | ○                | ○                                      | ○                                    | ○                                    | ○                                     | ○                                     |
|                               | Cr              | ○                | ○                | ○                                      | ○                                    | ○                                    | ○                                     | ○                                     |
|                               | UA              | ○                | ○                | ○                                      | ○                                    | ○                                    | ○                                     | ○                                     |
|                               | LDL-<br>Cho     | ○                | ○                | ○                                      | ○                                    | ○                                    | ○                                     | ○                                     |
|                               | HDL-<br>Cho     | ○                | ○                | ○                                      | ○                                    | ○                                    | ○                                     | ○                                     |
|                               | HbA1c           | ○                | ○                | ○                                      | ○                                    | ○                                    | ○                                     | ○                                     |
|                               | BS              | ○                | ○                | ○                                      | ○                                    | ○                                    | ○                                     | ○                                     |

**Table S1.** Schedule of the visit

**Table S2.** Baseline (0 week) characteristics of study participants.

Values are mean  $\pm$  SE. None of the characteristics was significantly different

|                         | Active( <i>n</i> = 50) |       |      | Placebo( <i>n</i> = 50) |       |      |
|-------------------------|------------------------|-------|------|-------------------------|-------|------|
|                         | Mean                   | $\pm$ | SE   | Mean                    | $\pm$ | SE   |
| Gender<br>(M = 1,F = 2) | 1.28                   | $\pm$ | 0.06 | 1.24                    | $\pm$ | 0.06 |
| Age                     | 51.02                  | $\pm$ | 1.22 | 50.30                   | $\pm$ | 1.18 |
| $\gamma$ -GTP(U/L)      | 36.74                  | $\pm$ | 2.75 | 36.10                   | $\pm$ | 1.99 |
| AST(U/L)                | 24.90                  | $\pm$ | 0.76 | 25.00                   | $\pm$ | 0.66 |
| ALT(U/L)                | 30.80                  | $\pm$ | 0.99 | 30.80                   | $\pm$ | 0.99 |



**Table S4.** Urinalysis (Active  $n = 48$  Placebo  $n = 50$ ) \* $P < 0.05$  vs Placebo. # $P < 0.05$  vs 0w

|                       | Group   | 0w                          |                             | 4w                          |                             | 8w                          |                             | 12w                         |                             | 16w                         |                             |    |    |    |    |    |   |    |    |    |    |   |    |    |   |    |    |   |   |   |   |
|-----------------------|---------|-----------------------------|-----------------------------|-----------------------------|-----------------------------|-----------------------------|-----------------------------|-----------------------------|-----------------------------|-----------------------------|-----------------------------|----|----|----|----|----|---|----|----|----|----|---|----|----|---|----|----|---|---|---|---|
|                       |         | Mean                        | ± SD                        |    |    |    |    |    |   |    |    |    |    |   |    |    |   |    |    |   |   |   |   |
| pH                    | Active  | 6.1                         | ± 0.7                       | 6.1                         | ± 0.7                       | 6.1                         | ± 0.8                       | 6.2                         | ± 0.7                       | 6.0                         | ± 0.6                       |    |    |    |    |    |   |    |    |    |    |   |    |    |   |    |    |   |   |   |   |
|                       | Placebo | 6.1                         | ± 0.8                       | 6.2                         | ± 0.7                       | 6.2                         | ± 0.7                       | 6.3                         | ± 0.7                       | 6.2                         | ± 0.7                       |    |    |    |    |    |   |    |    |    |    |   |    |    |   |    |    |   |   |   |   |
| Specific gravity      | Active  | 1.017                       | ± 0.007                     | 1.015                       | ± 0.007                     | 1.017                       | ± 0.007                     | 1.017                       | ± 0.008                     | 1.017                       | ± 0.007                     |    |    |    |    |    |   |    |    |    |    |   |    |    |   |    |    |   |   |   |   |
|                       | Placebo | 1.015                       | ± 0.008                     | 1.016                       | ± 0.008                     | 1.016                       | ± 0.008                     | 1.017                       | ± 0.007                     | 1.018                       | ± 0.009                     |    |    |    |    |    |   |    |    |    |    |   |    |    |   |    |    |   |   |   |   |
|                       |         |                             |                             |                             |                             |                             |                             |                             |                             |                             |                             |    |    |    |    |    |   |    |    |    |    |   |    |    |   |    |    |   |   |   |   |
|                       |         | 0w                          |                             | 4w                          |                             | 8w                          |                             | 12w                         |                             | 16w                         |                             |    |    |    |    |    |   |    |    |    |    |   |    |    |   |    |    |   |   |   |   |
|                       | Group   | (−) (±) (1+) (2+) (3+) (4+) | (−) (±) (1+) (2+) (3+) (4+) | (−) (±) (1+) (2+) (3+) (4+) | (−) (±) (1+) (2+) (3+) (4+) | (−) (±) (1+) (2+) (3+) (4+) | (−) (±) (1+) (2+) (3+) (4+) | (−) (±) (1+) (2+) (3+) (4+) | (−) (±) (1+) (2+) (3+) (4+) | (−) (±) (1+) (2+) (3+) (4+) | (−) (±) (1+) (2+) (3+) (4+) |    |    |    |    |    |   |    |    |    |    |   |    |    |   |    |    |   |   |   |   |
| Protein               | Active  | 43                          | 5                           | 0                           | 0                           | 0                           | 45                          | 2                           | 1                           | 0                           | 0                           | 47 | 1  | 0  | 0  | 43 | 4 | 1  | 0  | 0  | 45 | 3 | 0  | 0  | 0 | 0  |    |   |   |   |   |
|                       | Placebo | 43                          | 6                           | 1                           | 0                           | 0                           | 0                           | 44                          | 5                           | 1                           | 0                           | 0  | 0  | 46 | 4  | 1  | 0 | 0  | 0  | 47 | 2  | 1 | 0  | 0  | 0 | 42 | 8  | 0 | 0 | 0 |   |
| Glucose               | Active  | 48                          | 0                           | 0                           | 0                           | 0                           | 0                           | 48                          | 0                           | 0                           | 0                           | 0  | 48 | 0  | 0  | 0  | 0 | 48 | 0  | 0  | 0  | 0 | 47 | 1  | 0 | 0  | 0  | 0 |   |   |   |
|                       | Placebo | 50                          | 0                           | 0                           | 0                           | 0                           | 0                           | 50                          | 0                           | 0                           | 0                           | 0  | 50 | 0  | 0  | 0  | 0 | 50 | 0  | 0  | 0  | 0 | 50 | 0  | 0 | 0  | 0  | 0 |   |   |   |
| Urobilinogen          | Active  | −                           | 48                          | 0                           | 0                           | 0                           | 0                           | −                           | 48                          | 0                           | 0                           | 0  | 0  | −  | 48 | 0  | 0 | 0  | 0  | −  | 48 | 0 | 0  | 0  | 0 | −  | 48 | 0 | 0 | 0 |   |
|                       | Placebo | −                           | 50                          | 0                           | 0                           | 0                           | 0                           | −                           | 50                          | 0                           | 0                           | 0  | 0  | −  | 50 | 0  | 0 | 0  | 0  | −  | 50 | 0 | 0  | 0  | 0 | −  | 50 | 0 | 0 | 0 |   |
| Occult blood reaction | Active  | 45                          | 2                           | 1                           | 0                           | 0                           | 0                           | 46                          | 1                           | 0                           | 0                           | 1  | 0  | 48 | 0  | 0  | 0 | 0  | *  | 46 | 1  | 0 | 1  | 0  | 0 | 46 | 0  | 1 | 1 | 0 | 0 |
|                       | Placebo | 43                          | 4                           | 2                           | 1                           | 0                           | 0                           | 42                          | 5                           | 2                           | 1                           | 0  | 0  | 45 | 3  | 0  | 1 | 1  | 0  | 47 | 2  | 1 | 0  | 0  | 0 | 43 | 6  | 0 | 0 | 1 | 0 |
| Bilirubin             | Active  | 48                          | 0                           | 0                           | 0                           | 0                           | 0                           | 48                          | 0                           | 0                           | 0                           | 0  | 48 | 0  | 0  | 0  | 0 | 48 | 0  | 0  | 0  | 0 | 48 | 0  | 0 | 0  | 0  | 0 | 0 |   |   |
|                       | Placebo | 50                          | 0                           | 0                           | 0                           | 0                           | 0                           | 50                          | 0                           | 0                           | 0                           | 0  | 50 | 0  | 0  | 0  | 0 | 50 | 0  | 0  | 0  | 0 | 50 | 0  | 0 | 0  | 0  | 0 | 0 |   |   |
| Ketone bodies         | Active  | 48                          | 0                           | 0                           | 0                           | 0                           | 0                           | 48                          | 0                           | 0                           | 0                           | 0  | 48 | 0  | 0  | 0  | 0 | 48 | 0  | 0  | 0  | 0 | 48 | 0  | 0 | 0  | 0  | 0 | 0 |   |   |
|                       | Placebo | 49                          | 0                           | 0                           | 1                           | 0                           | 0                           | 49                          | 0                           | 0                           | 1                           | 0  | 0  | 50 | 0  | 0  | 0 | 0  | 50 | 0  | 0  | 0 | 0  | 49 | 0 | 0  | 0  | 0 | 0 |   |   |

|                                | Group   | 0w      |   |        | 4w      |   |        | 8w      |   |        | 12w     |   |        | 16w     |   |        |
|--------------------------------|---------|---------|---|--------|---------|---|--------|---------|---|--------|---------|---|--------|---------|---|--------|
|                                |         | Mean    | ± | SD     |
| WBC<br>(/μL)                   | Active  | 5408.33 | ± | 164.70 | 5404.17 | ± | 170.37 | 5493.75 | ± | 180.41 | 5410.42 | ± | 185.57 | 5341.67 | ± | 161.66 |
|                                | Placebo | 5568.00 | ± | 217.81 | 5592.00 | ± | 216.27 | 5474.00 | ± | 160.00 | 5400.00 | ± | 153.38 | 5378.00 | ± | 199.82 |
| RBC<br>(× 10 <sup>4</sup> /μL) | Active  | 477.90  | ± | 6.56   | 472.67  | ± | 6.93   | 471.33  | ± | 6.63   | 472.56  | ± | 6.64   | 466.50  | ± | 6.04   |
|                                | Placebo | 483.00  | ± | 6.22   | 481.26  | ± | 6.52   | 475.52  | ± | 5.87   | 475.02  | ± | 5.87   | 475.42  | ± | 5.46   |
| Hb<br>(g/dL)                   | Active  | 14.48   | ± | 0.18   | 14.35   | ± | 0.19   | 14.17   | ± | 0.17   | 14.26   | ± | 0.18   | 14.12   | ± | 0.18   |
|                                | Placebo | 14.78   | ± | 0.17   | 14.77   | ± | 0.17   | 14.52   | ± | 0.15   | 14.50   | ± | 0.15   | 14.54   | ± | 0.14   |
| Ht<br>(%)                      | Active  | 44.23   | ± | 0.54   | 43.81   | ± | 0.51   | 44.09   | ± | 0.51   | 43.73   | ± | 0.50   | 43.46   | ± | 0.50   |
|                                | Placebo | 44.82   | ± | 0.50   | 44.77   | ± | 0.51   | 44.62   | ± | 0.44   | 44.42   | ± | 0.44   | 44.68   | ± | 0.42   |
| MCV<br>(fl)                    | Active  | 92.74   | ± | 0.68   | 93.00   | ± | 0.75   | 93.80   | ± | 0.74   | 92.78   | ± | 0.71   | 93.35   | ± | 0.70   |
|                                | Placebo | 92.96   | ± | 0.53   | 93.22   | ± | 0.56   | 94.05   | ± | 0.60   | 93.72   | ± | 0.56   | 94.15   | ± | 0.49   |
| MCH<br>(pg)                    | Active  | 30.35   | ± | 0.24   | 30.44   | ± | 0.25   | 30.15   | ± | 0.26   | 30.25   | ± | 0.26   | 30.31   | ± | 0.25   |
|                                | Placebo | 30.66   | ± | 0.20   | 30.78   | ± | 0.21   | 30.61   | ± | 0.20   | 30.59   | ± | 0.20   | 30.64   | ± | 0.20   |
| MCHC<br>(%)                    | Active  | 32.73   | ± | 0.13   | 32.74   | ± | 0.14   | 32.15   | ± | 0.13   | 32.59   | ± | 0.12   | 32.48   | ± | 0.13   |
|                                | Placebo | 32.97   | ± | 0.12   | 33.01   | ± | 0.10   | 32.56   | ± | 0.12   | 32.64   | ± | 0.10   | 32.54   | ± | 0.10   |
| Plt<br>(× 10 <sup>4</sup> /μL) | Active  | 25.85   | ± | 0.70   | 25.78   | ± | 0.70   | 25.39   | ± | 0.70   | 25.98   | ± | 0.72   | 25.06   | ± | 0.71   |
|                                | Placebo | 25.87   | ± | 0.68   | 26.14   | ± | 0.70   | 25.92   | ± | 0.80   | 25.72   | ± | 0.69   | 24.91   | ± | 0.61   |

**Table S5.** Blood biochemistry test (Active  $n = 48$  Placebo  $n = 50$ )

\* $P < 0.05$  vs Placebo # $P < 0.05$  vs 0w

|         | Group   | 0w     |   |       | 4 w    |   |       | 8w     |        |      | 12w    |        |       | 16w    |        |       |       |      |
|---------|---------|--------|---|-------|--------|---|-------|--------|--------|------|--------|--------|-------|--------|--------|-------|-------|------|
|         |         | Mean   | ± | SE    | Mean   | ± | SE    | Mean   | ±      | SE   | Mean   | ±      | SE    | Mean   | ±      | SE    |       |      |
| TG      | Active  | 108.58 | ± | 7.00  | 123.71 | ± | 11.20 | 118.15 | ±      | 8.60 | 127.46 | ±      | 10.10 | 121.88 | ±      | 10.40 |       |      |
| (mg/dL) | Placebo | 102.20 | ± | 6.80  | 111.42 | ± | 9.10  | 113.22 | ±      | 8.00 | 118.20 | ±      | 8.70  | 110.72 | ±      | 7.40  |       |      |
| BUN     | Active  | 13.96  | ± | 0.40  | 13.58  | ± | 0.40  | 14.39  | ±      | 0.40 | 14.59  | ±      | 0.50  | 13.77  | ±      | 0.40  |       |      |
| (mg/dL) | Placebo | 13.18  | ± | 0.30  | 13.62  | ± | 0.40  | 13.52  | ±      | 0.40 | 13.60  | ±      | 0.40  | 13.90  | ±      | 0.40  |       |      |
| T-Bil   | Active  | 0.78   | ± | 0.34  | 0.78   | ± | 0.29  | 0.78   | ±      | 0.33 | 0.81   | ±      | 0.36  | 0.86   | ±      | 0.36  |       |      |
| (mg/dL) | Placebo | 0.75   | ± | 0.25  | 0.71   | ± | 0.26  | 0.72   | ±      | 0.27 | 0.73   | ±      | 0.24  | 0.76   | ±      | 0.25  |       |      |
| TP      | Active  | 7.23   | ± | 0.05  | 7.04   | ± | 0.05  | *,#    | 7.13   | ±    | 0.05   | 7.14   | ±     | 0.04   | 7.09   | ±     | 0.05  |      |
| (g/dL)  | Placebo | 7.28   | ± | 0.36  | 7.19   | ± | 0.36  |        | 7.19   | ±    | 0.36   | 7.12   | ±     | 0.34   | 7.15   | ±     | 0.30  |      |
| ALB     | Active  | 4.49   | ± | 0.32  | 4.40   | ± | 0.27  | *      | 4.38   | ±    | 0.24   | 4.40   | ±     | 0.25   | 4.40   | ±     | 0.27  |      |
| (g/dL)  | Placebo | 4.53   | ± | 0.28  | 4.50   | ± | 0.26  |        | 4.39   | ±    | 0.24   | #      | 4.44  | ±      | 0.24   | 4.46  | ±     | 0.23 |
| ALP     | Active  | 66.79  | ± | 16.06 | 67.38  | ± | 16.36 |        | 67.23  | ±    | 15.38  | 67.35  | ±     | 16.32  | 65.83  | ±     | 15.60 |      |
| (U/L)   | Placebo | 66.88  | ± | 15.91 | 66.76  | ± | 16.35 |        | 68.78  | ±    | 25.16  | 64.96  | ±     | 17.53  | 65.00  | ±     | 16.98 |      |
| LDH     | Active  | 188.50 | ± | 26.65 | 186.19 | ± | 29.80 |        | 186.44 | ±    | 24.91  | 186.21 | ±     | 28.18  | 187.46 | ±     | 28.08 |      |
| (U/L)   | Placebo | 182.42 | ± | 25.70 | 179.34 | ± | 27.83 |        | 179.32 | ±    | 26.39  | 176.72 | ±     | 28.40  | 178.54 | ±     | 27.45 |      |
| γ-GTP   | Active  | 35.08  | ± | 17.03 | 36.25  | ± | 19.56 |        | 34.38  | ±    | 18.06  | 34.04  | ±     | 18.61  | 33.15  | ±     | 18.22 |      |
| (U/L)   | Placebo | 35.94  | ± | 15.08 | 35.56  | ± | 16.43 |        | 44.48  | ±    | 66.24  | 35.48  | ±     | 17.15  | 35.34  | ±     | 16.83 |      |
| AST     | Active  | 26.02  | ± | 7.73  | 25.40  | ± | 6.78  |        | 25.85  | ±    | 8.06   | 24.63  | ±     | 6.62   | 23.88  | ±     | 6.19  |      |
| (U/L)   | Placebo | 24.44  | ± | 5.79  | 23.46  | ± | 4.90  |        | 23.78  | ±    | 4.84   | 23.88  | ±     | 5.99   | 25.08  | ±     | 16.61 |      |
| ALT     | Active  | 31.13  | ± | 11.96 | 30.96  | ± | 11.64 |        | 30.42  | ±    | 11.96  | 28.52  | ±     | 10.92  | 26.79  | ±     | 9.71  |      |
| (U/L)   | Placebo | 30.90  | ± | 10.39 | 29.40  | ± | 8.71  |        | 31.58  | ±    | 25.02  | 29.30  | ±     | 11.49  | 31.36  | ±     | 35.94 |      |
| Cr      | Active  | 0.80   | ± | 0.12  | 0.81   | ± | 0.13  |        | 0.79   | ±    | 0.13   | 0.80   | ±     | 0.13   | 0.82   | ±     | 0.14  |      |
| (mg/dL) | Placebo | 0.76   | ± | 0.14  | 0.77   | ± | 0.15  |        | 0.76   | ±    | 0.14   | 0.76   | ±     | 0.14   | 0.78   | ±     | 0.14  |      |
| UA      | Active  | 5.69   | ± | 1.25  | 5.80   | ± | 1.30  |        | 5.73   | ±    | 1.35   | 5.93   | ±     | 1.41   | 5.89   | ±     | 1.33  |      |
| (mg/dL) | Placebo | 5.96   | ± | 0.98  | 6.09   | ± | 1.08  |        | 6.12   | ±    | 1.04   | 6.10   | ±     | 1.04   | 6.17   | ±     | 1.02  |      |
| T-Cho   | Active  | 218.79 | ± | 32.79 | 220.19 | ± | 36.30 |        | 218.17 | ±    | 37.57  | 216.15 | ±     | 34.65  | 214.00 | ±     | 31.86 |      |
| (mg/dL) | Placebo | 211.46 | ± | 38.34 | 210.38 | ± | 40.28 |        | 207.88 | ±    | 38.73  | 211.82 | ±     | 40.84  | 207.64 | ±     | 38.00 |      |
| LDL-Cho | Active  | 135.94 | ± | 27.27 | 132.13 | ± | 32.66 |        | 133.25 | ±    | 32.32  | 130.17 | ±     | 28.90  | 129.63 | ±     | 29.11 |      |
| (mg/dL) | Placebo | 127.92 | ± | 36.24 | 125.28 | ± | 37.30 |        | 122.50 | ±    | 34.70  | 125.12 | ±     | 36.23  | 122.60 | ±     | 35.37 |      |
| HDL-Cho | Active  | 57.88  | ± | 13.15 | 58.60  | ± | 15.07 |        | 57.58  | ±    | 12.93  | 57.19  | ±     | 14.03  | 57.33  | ±     | 13.60 |      |
| (mg/dL) | Placebo | 60.10  | ± | 10.41 | 60.48  | ± | 11.25 |        | 60.34  | ±    | 12.38  | 60.48  | ±     | 11.60  | 60.14  | ±     | 12.05 |      |
| HbA1c   | Active  | 5.49   | ± | 0.32  | 5.46   | ± | 0.36  |        | 5.52   | ±    | 0.33   | 5.47   | ±     | 0.33   | 5.55   | ±     | 0.31  |      |
| (%)     | Placebo | 5.43   | ± | 0.31  | 5.37   | ± | 0.34  |        | 5.45   | ±    | 0.32   | 5.38   | ±     | 0.30   | 5.47   | ±     | 0.31  |      |
| BS      | Active  | 94.23  | ± | 7.62  | 92.67  | ± | 8.72  |        | 92.58  | ±    | 7.19   | 91.85  | ±     | 7.65   | 92.60  | ±     | 8.75  |      |
| (mg/dL) | Placebo | 92.94  | ± | 8.46  | 94.20  | ± | 8.53  |        | 93.26  | ±    | 8.26   | 92.34  | ±     | 7.83   | 92.10  | ±     | 7.54  |      |

Table S6. Blood biochemistry test (Active  $n = 48$  Placebo  $n = 50$ )

\* $P < 0.05$  vs Placebo # $P < 0.05$  vs 0w
